# Supplementary material for: Insights into Local Tumor Microenvironment Immune Factors Associated with Regression of Cutaneous Melanoma Metastases by Mycobacterium bovis Bacille Calmette–Guérin
Source: PubMed Central journal article supplement (PMC5380679; doi:10.3389/fonc.2017.00061), 2017-04-05
Supplement: table_1.pdf [file table_1.pdf]

Supplemental Table 1. Patient and Biopsy Information.

| Patient Number | Sex | Age at Diagnosis | Breslow Thickness of Primary | Response to ILBCG | Number of uninjected biopsies | Number of BCG injected biopsies | Weeks post ILBCG Injection |
|----------------|-----|------------------|------------------------------|-------------------|-------------------------------|---------------------------------|----------------------------|
| 1              | M   | 77               | 2.6 mm                       | PR                | 1 <sup>†</sup>                | 1 <sup>†</sup>                  | 9                          |
| 3              | F   | 84               | 1.5mm                        | NR                |                               | 2                               | 6, 8                       |
| 4              | F   | 62               | 1.95mm                       | R                 | 2                             | 1                               | 4                          |
| 5              | M   | 67               | 1.75mm                       | R                 | 1                             | 5                               | 4, 9,14,14,14              |
| 6              | M   | 62               | 1.75mm                       | R                 |                               | 1                               | 4                          |
| 7              | F   | 85               | >4.5mm                       | NR                | 4                             |                                 |                            |
| 9              | F   | 85               | 2.2mm                        | R                 | 3                             |                                 |                            |
| 10             | F   | 72               | 3.2 mm                       | R                 | 1 <sup>‡</sup>                | 1 <sup>‡</sup>                  | 14                         |

R: responder

NR: Non-responder

PR: partial responder

†: tissue for immunohistochemistry

‡: tissue for TIL isolation
